# Supplementary material for: Dietary Effects of Introducing Salt-Reduced Bread with and without Dietary Counselling—A Cluster Randomized Controlled Trial
Source: MDPI journal article supplement (doi:10.3390/nu14183852), 2022-09-17
Supplement: s1 [file s1]

Supplementary Table S1: Intake of food groups at baseline and estimated mean change from baseline to follow-up in the three groups (g/10MJ)

|                                  | Intervention A |                               |                                              |              | Intervention B |                               |                                           |              | Control |                               |                                           |              |
|----------------------------------|----------------|-------------------------------|----------------------------------------------|--------------|----------------|-------------------------------|-------------------------------------------|--------------|---------|-------------------------------|-------------------------------------------|--------------|
|                                  | n*             | Baseline<br>(median<br>[IQR]) | Estimated<br>mean change<br>in % (95%<br>CI) | P-<br>value  | n*             | Baseline<br>(median<br>[IQR]) | Estimated<br>mean change<br>in % (95% CI) | P-<br>value  | n*      | Baseline<br>(median<br>[IQR]) | Estimated<br>mean change<br>in % (95% CI) | P-value      |
| <i>Children</i>                  |                |                               |                                              |              |                |                               |                                           |              |         |                               |                                           |              |
| <i>Food groups</i>               |                |                               |                                              |              |                |                               |                                           |              |         |                               |                                           |              |
| Milk and milk products           | 40/36          | 512 [338, 678]                | -15 (-28, 1)                                 | 0.067        | 64/60          | 369 [261, 606]                | -16 (-29, -1)                             | <b>0.043</b> | 52/47   | 423 [323, 556]                | -8 (-25, 12)                              | 0.387        |
| Cheese and cheese products       | 40/33          | 29 [17, 41]                   | -43 (-64, -10)                               | <b>0.015</b> | 64/60          | 30 [15, 52]                   | -20 (-41, 8)                              | 0.144        | 51/47   | 30 [19, 54]                   | 8 (-21, 46)                               | 0.634        |
| Bread, total                     | 40/36          | 155 [124, 183]                | 31 (7, 58)                                   | <b>0.007</b> | 64/60          | 170 [142, 211]                | 22 (8, 38)                                | <b>0.001</b> | 52/47   | 178 [133, 234]                | 15 (2, 30)                                | <b>0.019</b> |
| Rye bread                        | 34/33          | 52 [28, 96]                   | 55 (-27, 229)                                | 0.256        | 55/56          | 72 [31, 112]                  | 77 (2, 206)                               | <b>0.041</b> | 50/45   | 79 [40, 119]                  | -3 (-24, 23)                              | 0.819        |
| Wheat bread                      | 40/36          | 93 [66, 113]                  | 30 (3, 65)                                   | <b>0.028</b> | 64/60          | 97 [66, 134]                  | 19 (-4, 48)                               | 0.105        | 52/45   | 102 [72, 121]                 | 4 (-25, 43)                               | 0.821        |
| Breakfast cereals                | 33/31          | 43 [13, 75]                   | -19 (-57, 52)                                | 0.503        | 53/52          | 35 [9, 99]                    | 20 (-30, 105)                             | 0.510        | 43/37   | 50 [12, 88]                   | -28 (-67, 57)                             | 0.401        |
| Rice and pasta                   | 39/35          | 44 [23, 84]                   | -35 (-63, 14)                                | 0.133        | 61/55          | 45 [28, 71]                   | -29 (-61, 27)                             | 0.249        | 50/44   | 43 [19, 76]                   | -15 (-48, 39)                             | 0.515        |
| Potatoes and potato products     | 36/33          | 31 [16, 44]                   | 73 (-28, 318)                                | 0.219        | 55/49          | 28 [10, 52]                   | -19 (-64, 80)                             | 0.606        | 43/35   | 17 [6, 34]                    | 27 (-49, 219)                             | 0.609        |
| Vegetables                       | 40/36          | 145 [122, 197]                | 5 (-16, 31)                                  | 0.701        | 64/60          | 166 [109, 227]                | 2 (-16, 22)                               | 0.875        | 52/47   | 150 [94, 193]                 | 20 (3, 39)                                | <b>0.017</b> |
| Fruit                            | 39/36          | 115 [77, 165]                 | 63 (7, 151)                                  | <b>0.024</b> | 63/60          | 141 [76, 182]                 | 38 (6, 79)                                | <b>0.016</b> | 52/47   | 140 [85, 174]                 | 12 (-16, 49)                              | 0.432        |
| Meat and poultry                 | 40/36          | 120 [93, 156]                 | 16 (-1, 36)                                  | 0.062        | 64/60          | 119 [88, 142]                 | -5 (-19, 12)                              | 0.551        | 52/47   | 104 [85, 143]                 | 11 (-4, 30)                               | 0.149        |
| Fish and fish products           | 28/17          | 16 [0, 24]                    | -68 (-88, -18)                               | <b>0.018</b> | 51/44          | 14 [3, 32]                    | -33 (-66, 31)                             | 0.238        | 41/26   | 13 [4, 34]                    | -74 (-88, -44)                            | <b>0.001</b> |
| Processed meat, poultry and fish | 40/36          | 51 [35, 71]                   | 15 (-10, 48)                                 | 0.251        | 64/60          | 61 [39, 78]                   | 7 (-11, 28)                               | 0.502        | 51/46   | 51 [39, 89]                   | -1 (-19, 21)                              | 0.910        |
| Butter and spreads               | 39/36          | 14 [8, 22]                    | 30 (-10, 90)                                 | 0.167        | 58/57          | 13 [7, 19]                    | 20 (-15, 68)                              | 0.302        | 47/45   | 24 [9, 33]                    | 14 (-24, 72)                              | 0.540        |
| Salty snacks                     | 29/23          | 6 [0, 12]                     | -24 (-66, 68)                                | 0.491        | 37/35          | 5 [0, 18]                     | -21 (-64, 73)                             | 0.561        | 33/33   | 4 [0, 14]                     | 45 (-29, 197)                             | 0.303        |
| Cakes, sweets and chocolate      | 38/36          | 81 [57, 115]                  | 80 (5, 210)                                  | <b>0.032</b> | 63/56          | 84 [57, 131]                  | -18 (-49, 31)                             | 0.400        | 52/45   | 90 [64, 120]                  | -13 (-39, 22)                             | 0.413        |
| Sugar sweetened beverages        | 37/32          | 136 [83, 276]                 | 16 (-42, 129)                                | 0.672        | 57/55          | 151 [81, 285]                 | 48 (-30, 213)                             | 0.303        | 44/38   | 123 [52, 253]                 | 8 (-53, 146)                              | 0.862        |
| <i>Bread fillings</i>            |                |                               |                                              |              |                |                               |                                           |              |         |                               |                                           |              |
| Fillings, total                  | 40/35          | 66 [41, 91]                   | -14 (-42, 27)                                | 0.445        | 64/59          | 67 [46, 108]                  | -19 (-33, -2)                             | <b>0.033</b> | 52/47   | 75 [54, 105]                  | -13 (-29, 6)                              | 0.164        |
| High salt (>2.5g/100g)           | 32/29          | 7 [2, 15]                     | 8 (-50, 132)                                 | 0.847        | 55/49          | 10 [4, 24]                    | -28 (-58, 22)                             | 0.222        | 44/41   | 10 [3, 18]                    | 33 (-21, 125)                             | 0.289        |
| Medium salt (1-2.5g/100g)        | 38/31          | 22 [11, 46]                   | -18 (-60, 67)                                | 0.589        | 58/53          | 20 [8, 36]                    | -2 (-40, 60)                              | 0.928        | 48/43   | 39 [22, 57]                   | -34 (-58, 2)                              | 0.064        |
| Low salt (<1.0g/100g)            | 38/33          | 28 [12, 45]                   | -30 (-61, 26)                                | 0.234        | 62/54          | 29 [17, 55]                   | -40 (-64, 0)                              | 0.051        | 49/42   | 24 [11, 34]                   | -35 (-62, 11)                             | 0.115        |
| <i>Adults</i>                    |                |                               |                                              |              |                |                               |                                           |              |         |                               |                                           |              |
| <i>Food groups</i>               |                |                               |                                              |              |                |                               |                                           |              |         |                               |                                           |              |
| Milk and milk products           | 41/38          | 268 [188, 492]                | -10 (-24, 6)                                 | 0.214        | 63/60          | 260 [159, 392]                | -14 (-27, 1)                              | 0.074        | 49/47   | 325 [189, 405]                | -12 (-26, 6)                              | 0.181        |
| Cheese and cheese products       | 41/37          | 49 [33, 68]                   | -26 (-50, 7)                                 | 0.115        | 63/60          | 42 [27, 65]                   | -13 (-26, 3)                              | 0.107        | 49/47   | 41 [19, 56]                   | 23 (-2, 54)                               | 0.069        |
| Bread, total                     | 41/38          | 152 [114, 199]                | 23 (5, 45)                                   | <b>0.011</b> | 63/60          | 150 [121, 186]                | 21 (8, 34)                                | <b>0.000</b> | 49/47   | 148 [122, 168]                | 17 (2, 34)                                | <b>0.027</b> |
| Rye bread                        | 40/37          | 70 [39, 115]                  | -1 (-22, 25)                                 | 0.919        | 60/58          | 73 [45, 95]                   | 12 (-18, 54)                              | 0.470        | 49/45   | 67 [39, 94]                   | -24 (-50, 15)                             | 0.192        |
| Wheat bread                      | 41/38          | 79 [50, 108]                  | 42 (12, 80)                                  | <b>0.004</b> | 63/60          | 82 [51, 109]                  | 36 (11, 68)                               | <b>0.004</b> | 49/47   | 75 [53, 114]                  | 35 (6, 72)                                | <b>0.014</b> |
| Breakfast cereals                | 27/23          | 17 [0, 53]                    | -37 (-71, 38)                                | 0.248        | 49/43          | 24 [5, 57]                    | -33 (-62, 19)                             | 0.169        | 35/26   | 27 [0, 52]                    | -69 (-84, -38)                            | <b>0.001</b> |
| Rice and pasta                   | 39/36          | 27 [17, 52]                   | 13 (-34, 95)                                 | 0.658        | 60/56          | 40 [25, 66]                   | -31 (-59, 17)                             | 0.170        | 47/43   | 41 [24, 76]                   | -23 (-51, 20)                             | 0.241        |
| Potatoes and potato products     | 38/34          | 33 [18, 64]                   | 19 (-46, 164)                                | 0.666        | 55/55          | 35 [16, 66]                   | 103 (-3, 326)                             | 0.060        | 45/42   | 38 [13, 50]                   | 44 (-36, 225)                             | 0.374        |
| Vegetables                       | 41/38          | 179 [119, 237]                | 14 (-8, 39)                                  | 0.218        | 63/60          | 247 [155, 335]                | -7 (-18, 6)                               | 0.270        | 49/47   | 229 [162, 284]                | -1 (-15, 15)                              | 0.937        |

|                                  |       |               |               |              |       |               |                |              |       |                |                |              |
|----------------------------------|-------|---------------|---------------|--------------|-------|---------------|----------------|--------------|-------|----------------|----------------|--------------|
| Fruit                            | 41/37 | 100 [44, 186] | 31 (-10, 90)  | 0.152        | 62/60 | 102 [38, 160] | 76 (26, 146)   | <b>0.001</b> | 49/47 | 97 [34, 164]   | 19 (-9, 55)    | 0.201        |
| Meat and poultry                 | 41/38 | 142 [99, 171] | 21 (6, 36)    | <b>0.003</b> | 63/60 | 134 [93, 164] | 3 (-10, 19)    | 0.685        | 48/46 | 132 [101, 157] | 11 (-11, 39)   | 0.370        |
| Fish and fish products           | 33/25 | 17 [4, 35]    | -52 (-78, 2)  | 0.056        | 56/53 | 24 [7, 43]    | 1 (-42, 77)    | 0.973        | 42/41 | 21 [11, 48]    | -9 (-50, 63)   | 0.746        |
| Processed meat, poultry and fish | 41/38 | 51 [33, 80]   | 37 (0, 88)    | <b>0.047</b> | 63/59 | 54 [37, 75]   | -12 (-32, 14)  | 0.330        | 47/47 | 51 [32, 81]    | 10 (-18, 48)   | 0.539        |
| Butter and spreads               | 35/33 | 12 [3, 17]    | -16 (-52, 49) | 0.556        | 59/54 | 10 [5, 18]    | -11 (-39, 30)  | 0.540        | 47/42 | 18 [9, 25]     | -17 (-43, 23)  | 0.357        |
| Salty snacks                     | 30/21 | 5 [0, 10]     | -47 (-78, 23) | 0.141        | 40/34 | 3 [0, 8]      | -31 (-65, 36)  | 0.292        | 29/31 | 4 [0, 10]      | 24 (-40, 156)  | 0.566        |
| Cakes, sweets and chocolate      | 40/38 | 87 [48, 129]  | 8 (-23, 51)   | 0.660        | 62/58 | 93 [67, 138]  | -31 (-47, -10) | <b>0.007</b> | 48/46 | 84 [64, 105]   | -3 (-32, 39)   | 0.880        |
| Sugar sweetened beverages        | 33/32 | 156 [41, 251] | 39 (-50, 286) | 0.531        | 52/53 | 106 [40, 208] | 69 (-30, 310)  | 0.244        | 39/42 | 60 [16, 164]   | 171 (-0, 639)  | 0.051        |
| <i>Bread fillings</i>            |       |               |               |              |       |               |                |              |       |                |                |              |
| Fillings, total                  | 41/37 | 97 [62, 143]  | -13 (-40, 27) | 0.478        | 62/59 | 96 [66, 135]  | -15 (-32, 7)   | 0.164        | 49/47 | 83 [63, 124]   | -17 (-36, 7)   | 0.152        |
| High salt (>2.5g/100g)           | 36/33 | 9 [3, 16]     | 21 (-37, 132) | 0.574        | 51/48 | 8 [2, 19]     | -20 (-55, 40)  | 0.437        | 39/39 | 9 [2, 16]      | -4 (-53, 95)   | 0.905        |
| Medium salt (1-2.5g/100g)        | 40/35 | 52 [31, 82]   | -32 (-57, 9)  | 0.117        | 60/57 | 43 [28, 66]   | -18 (-40, 12)  | 0.213        | 48/43 | 43 [25, 60]    | -27 (-54, 15)  | 0.175        |
| Low salt (<1.0g/100g)            | 38/36 | 32 [10, 46]   | 13 (-34, 92)  | 0.661        | 59/56 | 35 [14, 54]   | -2 (-33, 45)   | 0.935        | 49/43 | 27 [16, 48]    | -51 (-71, -15) | <b>0.011</b> |

All analyses are based on imputed datasets and presented as mean change in % with 95% CI calculated using mixed models with age, gender, BMI, parental education, under- and acceptable energy intake as fixed effects and participant as random effect. Baseline values are based on observed values and includes participants with zero intake. All values were logtransformed before analysis. P-values in bold are significant.

\*Number of participant with an intake >0g/day at baseline/follow-up

Supplementary Table S2: Estimated differences between groups at follow-up in intake of food groups (g/10MJ)

|                                  |      | Intervention A compared to control |              | Intervention B compared to control |              | Intervention B compared to Intervention A |              |
|----------------------------------|------|------------------------------------|--------------|------------------------------------|--------------|-------------------------------------------|--------------|
|                                  |      | Mean difference in % (95% CI)      |              | Mean difference in % (95% CI)      |              | Mean difference in % (95% CI)             |              |
|                                  | ICC  | CI)                                | P-value      | in % (95% CI)                      | P-value      |                                           | P-value      |
| Children                         |      |                                    |              |                                    |              |                                           |              |
| Food groups                      |      |                                    |              |                                    |              |                                           |              |
| Milk and milk products           | 0.30 | 7 (-19, 40)                        | 0.633        | -3 (-24, 23)                       | 0.785        | -9 (-30, 17)                              | 0.453        |
| Cheese and cheese products       | 0.46 | -52 (-73, -15)                     | <b>0.011</b> | -23 (-54, 28)                      | 0.316        | 60 (-7, 176)                              | 0.091        |
| Bread, total                     | 0.39 | -4 (-23, 18)                       | 0.685        | 4 (-13, 24)                        | 0.668        | 9 (-11, 32)                               | 0.408        |
| Rye bread                        | 0.32 | 3 (-51, 116)                       | 0.932        | 48 (-24, 186)                      | 0.248        | 43 (-29, 190)                             | 0.321        |
| Wheat bread                      | 0.84 | 9 (-33, 78)                        | 0.732        | 13 (-28, 77)                       | 0.605        | 3 (-36, 66)                               | 0.892        |
| Breakfast cereals                | 0.41 | 36 (-50, 267)                      | 0.548        | 91 (-23, 370)                      | 0.160        | 41 (-46, 268)                             | 0.485        |
| Rice and pasta                   | 0.65 | 8 (-56, 164)                       | 0.863        | 30 (-43, 192)                      | 0.532        | 20 (-49, 182)                             | 0.679        |
| Potatoes and potato products     | 0.58 | 70 (-53, 512)                      | 0.417        | 1 (-68, 222)                       | 0.988        | -41 (-83, 102)                            | 0.404        |
| Vegetables                       | 0.59 | -11 (-34, 19)                      | 0.419        | -13 (-34, 13)                      | 0.295        | -2 (-26, 30)                              | 0.885        |
| Fruit                            | 0.60 | 32 (-14, 103)                      | 0.205        | 23 (-17, 81)                       | 0.300        | -7 (-39, 41)                              | 0.729        |
| Meat and poultry                 | 0.58 | 12 (-14, 48)                       | 0.397        | -12 (-31, 13)                      | 0.309        | -22 (-39, 1)                              | 0.061        |
| Fish and fish products           | 0.52 | -10 (-73, 199)                     | 0.860        | 239 (14, 908)                      | <b>0.028</b> | 278 (18, 1109)                            | <b>0.025</b> |
| Processed meat, poultry and fish | 0.41 | 23 (-13, 74)                       | 0.233        | 11 (-19, 51)                       | 0.511        | -10 (-35, 24)                             | 0.523        |
| Butter and spreads               | 0.15 | 7 (-34, 71)                        | 0.794        | -18 (-46, 24)                      | 0.345        | -23 (-51, 20)                             | 0.249        |
| Cakes, sweets and chocolate      | 0.89 | 77 (-15, 271)                      | 0.130        | 8 (-45, 111)                       | 0.826        | -39 (-70, 23)                             | 0.169        |
| Sugar sweetened beverages        | 0.43 | 24 (-63, 317)                      | 0.722        | 77 (-41, 428)                      | 0.308        | 42 (-56, 356)                             | 0.557        |
| Bread fillings                   |      |                                    |              |                                    |              |                                           |              |
| Fillings, total                  | 0.58 | -6 (-40, 48)                       | 0.803        | -7 (-38, 40)                       | 0.725        | -1 (-36, 52)                              | 0.944        |
| High salt (>2.5g/100g)           | 0.29 | -35 (-73, 54)                      | 0.330        | -32 (-69, 47)                      | 0.321        | 4 (-55, 139)                              | 0.929        |
| Medium salt (1-2.5g/100g)        | -    | 11 (-48, 139)                      | 0.784        | 15 (-42, 128)                      | 0.687        | 3 (-50, 116)                              | 0.929        |
| Low salt (<1.0g/100g)            | 0.25 | -1 (57, 128)                       | 0.978        | 12 (-47, 137)                      | 0.774        | 13 (-49, 153)                             | 0.767        |
| Adults                           |      |                                    |              |                                    |              |                                           |              |
| Food groups                      |      |                                    |              |                                    |              |                                           |              |
| Milk and milk products           | 0.17 | 5 (-20, 37)                        | 0.738        | -4 (-25, 22)                       | 0.742        | -8 (-29, 18)                              | 0.504        |
| Cheese and cheese products       | 0.16 | -28 (-51, 6)                       | 0.094        | -24 (-45, 7)                       | 0.119        | 6 (-26, 52)                               | 0.744        |
| Bread, total                     | 0.33 | 5 (-13, 28)                        | 0.592        | 9 (-7, 29)                         | 0.289        | 4 (-13, 24)                               | 0.693        |
| Rye bread                        | 0.24 | 37 (-20, 134)                      | 0.256        | 46 (-10, 136)                      | 0.126        | 7 (-36, 78)                               | 0.803        |
| Wheat bread                      | 0.41 | -1 (-26, 34)                       | 0.967        | 4 (-20, 36)                        | 0.761        | 5 (-21, 40)                               | 0.742        |
| Breakfast cereals                | 0.30 | 94 (-32, 459)                      | 0.218        | 181 (9, 629)                       | <b>0.033</b> | 45 (-47, 297)                             | 0.473        |
| Rice and pasta                   | 0.04 | 36 (-35, 185)                      | 0.409        | -9 (-53, 76)                       | 0.784        | -33 (-67, 35)                             | 0.260        |
| Potatoes and potato products     | 0.47 | 5 (-63, 194)                       | 0.928        | 19 (-53, 202)                      | 0.718        | 13 (-58, 204)                             | 0.805        |
| Vegetables                       | 0.15 | 9 (-14, 37)                        | 0.474        | -5 (-22, 17)                       | 0.638        | -13 (-31, 10)                             | 0.256        |
| Fruit                            | 0.13 | 5 (-30, 57)                        | 0.802        | 43 (0, 104)                        | <b>0.049</b> | 36 (-8, 99)                               | 0.118        |
| Meat and poultry                 | 0.59 | 26 (1, 57)                         | <b>0.044</b> | 4 (-15, 28)                        | 0.676        | -17 (-33, 3)                              | 0.084        |
| Fish and fish products           | 0.22 | -49 (-79, 22)                      | 0.130        | 17 (-46, 153)                      | 0.700        | 128 (-1, 423)                             | 0.052        |
| Processed meat, poultry and fish | 0.63 | 37 (-15, 119)                      | 0.196        | -10 (-41, 39)                      | 0.646        | -34 (-58, 4)                              | 0.074        |
| Butter and spreads               | -    | -30 (-63, 31)                      | 0.263        | -10 (-48, 56)                      | 0.705        | 29 (-28, 132)                             | 0.399        |
| Cakes, sweets and chocolate      | 0.19 | 8 (-32, 72)                        | 0.746        | -24 (-50, 14)                      | 0.188        | -30 (-55, 9)                              | 0.118        |

|                           |      |                |       |               |       |               |       |
|---------------------------|------|----------------|-------|---------------|-------|---------------|-------|
| Sugar sweetened beverages | 0.04 | -29 (-76, 115) | 0.549 | -9 (-66, 142) | 0.845 | 27 (-55, 263) | 0.654 |
| <i>Bread fillings</i>     |      |                |       |               |       |               |       |
| Fillings, total           | 0.09 | 6 (-30, 60)    | 0.788 | 5 (-27, 51)   | 0.778 | 0 (-33, 47)   | 0.981 |
| High salt (>2.5g/100g)    | 0.09 | 43 (-36, 221)  | 0.379 | -13 (-57, 79) | 0.710 | -39 (-72, 31) | 0.205 |
| Medium salt (1-2.5g/100g) | 0.11 | 2 (-46, 91)    | 0.953 | 21 (-30, 111) | 0.497 | 19 (-34, 116) | 0.568 |
| Low salt (<1.0g/100g)     | 0.14 | 67 (-19, 245)  | 0.168 | 67 (-12, 216) | 0.114 | 0 (-49, 98)   | 0.996 |

---

Analyses are based on imputed datasets and presented as mean difference in % with 95% CI calculated using mixed models with treatment group, age, gender, BMI, parental education, and under- and acceptable reported energy intake as fixed effects and family as random effect. All values were log transformed before analysis. P-values in bold are significant. ICC = Intraclass correlation coefficient

Supplementary Table S3: Intake of energy and nutrients at baseline and estimated mean change from baseline to follow-up in the three groups

|                           | Intervention A     |                                |              | Intervention B     |                                |              | Control            |                                |              |
|---------------------------|--------------------|--------------------------------|--------------|--------------------|--------------------------------|--------------|--------------------|--------------------------------|--------------|
|                           | Baseline mean (SD) | Estimated mean change (95% CI) | P-value      | Baseline mean (SD) | Estimated mean change (95% CI) | P-value      | Baseline mean (SD) | Estimated mean change (95% CI) | P-value      |
| <i>Children &lt;18y</i>   |                    |                                |              |                    |                                |              |                    |                                |              |
| <i>n</i>                  | 40                 |                                |              | 64                 |                                |              | 52                 |                                |              |
| Energy (kJ/d)             | 7459 (2283)        | -369 (-897, 158)               | 0.170        | 6827 (2382)        | 67 (-388, 523)                 | 0.773        | 6867 (1501)        | -385 (-745, -25)               | <b>0.036</b> |
| Macronutrients            |                    |                                |              |                    |                                |              |                    |                                |              |
| Fat (E%)                  | 34.6 (4.3)         | 0.7 (-0.6, 2.0)                | 0.300        | 33.6 (4.3)         | -0.3 (-1.7, 1.0)               | 0.648        | 35.9 (4.4)         | -0.2 (-1.7, 1.2)               | 0.744        |
| Saturated fat (E%)        | 13.6 (2.3)         | -0.2 (-1.0, 0.6)               | 0.556        | 12.8 (2.3)         | -1.2 (-2.0, -0.4)              | <b>0.003</b> | 14.3 (2.8)         | -0.9 (-1.8, 0.0)               | 0.051        |
| Carbohydrates, total (E%) | 50.2 (5.6)         | -0.4 (-1.9, 1.0)               | 0.566        | 51.4 (4.9)         | 0.5 (-1.0, 1.9)                | 0.526        | 49.7 (4.6)         | 0.3 (-1.2, 1.9)                | 0.664        |
| Added sugar (E%)          | 10.3 (4.6)         | 0.2 (-1.1, 1.5)                | 0.811        | 9.1 (3.6)          | 1.1 (0.1, 2.2)                 | <b>0.030</b> | 9.5 (4.5)          | 0.7 (-0.6, 2.1)                | 0.291        |
| Protein (E%)              | 15.3 (2.6)         | -0.3 (-1.0, 0.4)               | 0.424        | 15.0 (2.5)         | -0.1 (-0.6, 0.4)               | 0.646        | 14.3 (1.9)         | -0.1 (-0.6, 0.5)               | 0.811        |
| Dietary fiber (g/10MJ)    | 23 (5)             | 0 (-2, 1)                      | 0.626        | 26 (6)             | 0 (-2, 1)                      | 0.583        | 25 (7)             | -1 (-3, 0)                     | <b>0.047</b> |
| Micronutrients            |                    |                                |              |                    |                                |              |                    |                                |              |
| Sodium (g/10MJ)           | 3.7 (0.6)          | -0.5 (-0.7, -0.2)              | <b>0.000</b> | 4.0 (0.7)          | -0.5 (-0.8, -0.2)              | <b>0.001</b> | 3.8 (0.6)          | 0.1 (-0.2, 0.3)                | 0.538        |
| Potassium (g/10MJ)        | 3.1 (0.5)          | 0.1 (-0.1, 0.3)                | 0.255        | 3.2 (0.6)          | 0.1 (-0.1, 0.2)                | 0.480        | 2.9 (0.5)          | 0.1 (-0.0, 0.2)                | 0.112        |
| <i>Adults ≥18y</i>        |                    |                                |              |                    |                                |              |                    |                                |              |
| <i>n</i>                  | 41                 |                                |              | 63                 |                                |              | 49                 |                                |              |
| Energy (kJ/d)             | 9189 (2464)        | -441 (-1084, 202)              | 0.179        | 8577 (2104)        | 587 (95, 1080)                 | <b>0.019</b> | 9067 (1870)        | -404 (-866, 58)                | 0.086        |
| Macronutrients            |                    |                                |              |                    |                                |              |                    |                                |              |
| Fat (E%)                  | 37.1 (5.5)         | 1.4 (-0.0, 2.8)                | 0.058        | 36.8 (4.0)         | 0.3 (-0.9, 1.4)                | 0.663        | 37.9 (5.4)         | 0.9 (-0.5, 2.3)                | 0.208        |
| Saturated fat (E%)        | 14.0 (2.7)         | 0.2 (-0.4, 0.8)                | 0.580        | 13.6 (2.4)         | -0.5 (-1.2, 0.2)               | 0.133        | 14.2 (2.9)         | -0.1 (-0.9, 0.7)               | 0.891        |
| Carbohydrates, total (E%) | 46.8 (5.9)         | -1.7 (-3.3, -0.0)              | <b>0.048</b> | 46.8 (4.3)         | -0.3 (-1.6, 1.1)               | 0.707        | 46.3 (5.8)         | -0.8 (-2.3, 0.7)               | 0.294        |
| Added sugar (E%)          | 9.9 (6.7)          | -0.6 (-2.0, 0.8)               | 0.382        | 8.3 (4.0)          | 0.4 (-0.6, 1.4)                | 0.452        | 8.7 (5.3)          | 0.7 (-0.4, 1.8)                | 0.236        |
| Protein (E%)              | 16.1 (2.4)         | 0.2 (-0.6, 1.1)                | 0.567        | 16.4 (2.3)         | 0.0 (-0.6, 0.6)                | 0.999        | 15.9 (2.5)         | 0.0 (-0.7, 0.6)                | 0.894        |
| Dietary fiber (g/10MJ)    | 24 (7)             | -1 (-3, 1)                     | 0.195        | 26 (6)             | -2 (-3, 0)                     | <b>0.020</b> | 25 (6)             | -2 (-4, -1)                    | <b>0.007</b> |
| Micronutrients            |                    |                                |              |                    |                                |              |                    |                                |              |
| Sodium (g/10MJ)           | 3.9 (0.7)          | -0.2 (-0.5, 0.0)               | 0.064        | 4.1 (0.8)          | -0.5 (-0.7, -0.3)              | <b>0.000</b> | 4.1 (0.7)          | -0.1 (-0.3, 0.2)               | 0.570        |
| Potassium (g/10MJ)        | 3.4 (0.6)          | 0.1 (-0.1, 0.3)                | 0.189        | 3.6 (0.6)          | 0.1 (-0.1, 0.2)                | 0.490        | 3.5 (0.6)          | 0.0 (-0.2, 0.2)                | 0.936        |

All analyses are based on imputed datasets and presented as mean change with 95% CI calculated using mixed models with age, gender, BMI, parental education, and under- and acceptable reported energy intake as fixed effects and participant as random effect. P-values in bold are significant.

Supplementary Table S4: Estimated differences between groups at follow-up in intake of energy and nutrients (g/10MJ)

|                           | ICC  | Intervention A compared to control |              | Intervention B compared to control |              | Intervention B compared to Intervention A |              |
|---------------------------|------|------------------------------------|--------------|------------------------------------|--------------|-------------------------------------------|--------------|
|                           |      | Mean difference (95% CI)           | P-value      | Mean difference (95% CI)           | P-value      | Mean difference (95% CI)                  | P-value      |
| <i>Children &lt;18y</i>   |      |                                    |              |                                    |              |                                           |              |
| Energy (kJ/d)             | 0.39 | 49 (-478, 575)                     | 0.856        | 219.9 (-260.6, 700.3)              | 0.370        | 171 (-334, 676)                           | 0.506        |
| Macronutrients            |      |                                    |              |                                    |              |                                           |              |
| Fat (E%)                  | 0.47 | 0.0 (-2.3, 2.3)                    | 0.990        | -1.4 (-3.5, 0.7)                   | 0.197        | -1.4 (-3.6, 0.8)                          | 0.214        |
| Saturated fat (E%)        | 0.53 | 0.0 (-1.3, 1.4)                    | 0.977        | -1.3 (-2.5, -0.1)                  | <b>0.040</b> | -1.3 (-2.6, -0.0)                         | <b>0.046</b> |
| Carbohydrates, total (E%) | 0.42 | -0.3 (-2.7, 2.2)                   | 0.839        | 1.2 (-0.9, 3.4)                    | 0.269        | 1.5 (-0.8, 3.8)                           | 0.213        |
| Added sugar (E%)          | 0.58 | 0.1 (-2.0, 2.3)                    | 0.897        | 0.6 (-1.4, 2.5)                    | 0.557        | 0.4 (-1.6, 2.5)                           | 0.678        |
| Protein (E%)              | 0.31 | 0.2 (-0.7, 1.0)                    | 0.678        | 0.2 (-0.6, 0.9)                    | 0.672        | 0.0 (-0.8, 0.8)                           | 0.975        |
| Dietary fiber (g/10MJ)    | 0.41 | 0 (-2, 2)                          | 0.960        | 1 (-1, 3)                          | 0.215        | 1 (-1, 3)                                 | 0.267        |
| Micronutrients            |      |                                    |              |                                    |              |                                           |              |
| Sodium (g/10MJ)           | 0.67 | -0.6 (-1.0, -0.1)                  | <b>0.015</b> | -0.4 (-0.8, 0.0)                   | 0.061        | 0.2 (-0.3, 0.6)                           | 0.437        |
| Potassium (g/10MJ)        | 0.50 | 0.1 (-0.2, 0.3)                    | 0.588        | 0.0 (-0.2, 0.3)                    | 0.803        | 0.0 (-0.3, 0.2)                           | 0.744        |
| <i>Adults ≥18y</i>        |      |                                    |              |                                    |              |                                           |              |
| Energy (kJ/d)             | 0.16 | -78 (-676, 520)                    | 0.799        | 841 (311, 1372)                    | <b>0.002</b> | 919 (345, 1493)                           | <b>0.002</b> |
| Macronutrients            |      |                                    |              |                                    |              |                                           |              |
| Fat (E%)                  | 0.20 | -0.1 (-1.9, 1.8)                   | 0.946        | -1.3 (-2.9, 0.4)                   | 0.132        | -1.2 (-3.0, 0.6)                          | 0.181        |
| Saturated fat (E%)        | 0.24 | 0.1 (-1.0, 1.1)                    | 0.909        | -0.7 (-1.7, 0.2)                   | 0.117        | -0.8 (-1.8, 0.2)                          | 0.113        |
| Carbohydrates, total (E%) | 0.25 | -0.5 (-2.7, 1.8)                   | 0.674        | 1.0 (-1.0, 3.0)                    | 0.325        | 1.5 (-0.7, 3.6)                           | 0.173        |
| Added sugar (E%)          | 0.42 | -1.3 (-3.2, 0.6)                   | 0.178        | -0.5 (-2.2, 1.2)                   | 0.564        | 0.8 (-1.0, 2.6)                           | 0.386        |
| Protein (E%)              | 0.36 | 0.6 (-0.5, 1.6)                    | 0.306        | 0.3 (-0.7, 1.2)                    | 0.559        | -0.3 (-1.3, 0.7)                          | 0.601        |
| Dietary fiber (g/10MJ)    | 0.37 | 1 (-1, 3)                          | 0.493        | 1 (-1, 3)                          | 0.267        | 0 (-2, 2)                                 | 0.748        |
| Micronutrients            |      |                                    |              |                                    |              |                                           |              |
| Sodium (g/10MJ)           | 0.48 | -0.3 (-0.6, 0.1)                   | 0.115        | -0.4 (-0.7, -0.1)                  | <b>0.008</b> | -0.1 (-0.5, 0.2)                          | 0.408        |
| Potassium (g/10MJ)        | 0.20 | 0.2 (-0.1, 0.4)                    | 0.277        | 0.1 (-0.2, 0.3)                    | 0.597        | -0.1 (-0.4, 0.2)                          | 0.515        |

Analyses are based on imputed datasets and presented as mean difference with 95% CI calculated using mixed models with treatment group, age, gender, BMI, parental education, and under- and acceptable reported energy intake as fixed effects and family as random effect. P-values in bold are significant. ICC = Intraclass correlation coefficient
